# Supplementary material
Source: PubMed Central journal article supplement (PMC5570669)
Supplement: NIHMS857883-supplement-8.pdf [file NIHMS857883-supplement-8.pdf]

**Nandhu et al.**

Tumor-derived fibulin-3 activates pro-invasive NF-kappa B signaling in glioblastoma cells and their microenvironment

**Supplementary Table S-I:**

Antibodies used for Western blotting and immunohistochemistry

| <b>Antigen</b>            | <b>Source</b>                     | <b>Catalog number</b> |
|---------------------------|-----------------------------------|-----------------------|
| RelA/p65                  | Cell Signaling Technology         | 8242                  |
| phospho-RelA/p-p65        | Cell Signaling Technology         | 3037                  |
| IKK $\alpha$              | Cell Signaling Technology         | 2682                  |
| IKK $\beta$               | Cell Signaling Technology         | 2678                  |
| phospho-IKK $\alpha\beta$ | Cell Signaling Technology         | 2697                  |
| IKB                       | Cell Signaling Technology         | 4812                  |
| RIP-2                     | Cell Signaling Technology         | 4982                  |
| p-RIP-2                   | Cell Signaling Technology         | 4364                  |
| TNF $\alpha$              | Cell Signaling Technology         | 3707                  |
| Fibulin-3                 | Santa Cruz Biotechnology (mAb3-5) | sc-33722              |
| GFAP                      | Sigma Aldrich                     | G3893                 |
| Alpha/Beta tubulin        | Cell Signaling Technology         | 2148                  |
| Beta Actin                | Cell Signaling Technology         | 4970                  |
| Phospho-RelB              | Cell Signaling Technology         | 5025                  |
| RelB                      | Cell Signaling Technology         | 10544S                |
| ADAM 17                   | Cell Signaling Technology         | 3976                  |
