# Supplementary material
Source: PubMed Central journal article supplement (PMC5570669)
Supplement: NIHMS857883-supplement-9.pdf [file NIHMS857883-supplement-9.pdf]

**Nandhu et al.**

Tumor-derived fibulin-3 activates pro-invasive NF-kappa B signaling in glioblastoma cells and their microenvironment

**Supplementary Table S-II:**

Sequences used for siRNA and qRT-PCR primers

| Target          | Sequence                 | Species             |
|-----------------|--------------------------|---------------------|
| RelA/P65 siRNA1 | 5'-AAGATCAATGGCTACACAGGA | human               |
| RelA/P65 siRNA2 | 5'-CCGGATTGAGGAGAAACGTAA | human               |
| CYLD siRNA1     | 5'-AAAGAACGATGTAGAATATTA | human               |
| CYLD siRNA2     | 5'-CACCAAGATGCCCAATACCAA | human               |
| GAPDH forward   | 5'-AGTCCATGCCATCACTGCCAC | human / rat / mouse |
| GAPDH reverse   | 5'-ATGACCTTGCCACAGCCTTG  | human / rat / mouse |
| TNC forward     | 5'-TTCAGCAGAATTGGGGATTT  | human               |
| TNC reverse     | 5'-ACCTAGGTCTCTCGCCCATC  | human               |
| MLCK forward    | 5'-CTGGGAAGCTCCTGAAGTTG  | human               |
| MLCK reverse    | 5'-GCGGGAAGGATTCTTCAAAA  | human               |
| MMP9 forward    | 5'-TCATCCAGTTTGGTGTGCGG  | human / rat / mouse |
| MMP9 reverse    | 5'-GACCACAACCTCGTCGTCGTC | human / rat / mouse |
| MMP13 forward   | 5'-GAGGTGACTGGCAAACCTTGA | human / rat / mouse |
| MMP13 reverse   | 5'-ATATCAGGGGTGTAATTCAC  | human / rat / mouse |
| CYLD forward    | 5'-GCCACTATGTTGCTTTTGTG  | human               |
| CYLD reverse    | 5'-CAGAGACATCTTCAAGTACT  | human               |
| IL2 Forward     | 5'-GCACTTCCTCCAGAGGTTTG  | human               |
| IL2 Reverse     | 5'-TCACCAGGATGCTCACATTT  | human               |
| IL12B Forward   | 5'-GTTCCCATATGGCCACGAG   | human               |
| IL12B Reverse   | 5'-AGGGCCATTGGACTCTCC    | human               |
| IL17 Forward    | 5'-CACTTTGCCTCCAGATCAC   | human               |
| IL 17 Reverse   | 5'-ACCAATCCCAAAGGTCCTC   | human               |
