# Supplementary material
Source: PubMed Central journal article supplement (PMC5570669)
Supplement: NIHMS857883-supplement-10.pdf [file NIHMS857883-supplement-10.pdf]

**Nandhu et al.**

Tumor-derived fibulin-3 activates pro-invasive NF-kappa B signaling in glioblastoma cells and their microenvironment

**Supplementary Table S-III:**

List of NF-kB-regulated genes and their correlation with fibulin-3

|                     |               |                     |                                                    |                   |               |
|---------------------|---------------|---------------------|----------------------------------------------------|-------------------|---------------|
| <b>Target gene:</b> | <b>EFEMP1</b> | <b>NM_001039348</b> | <b>EGF containing fibulin like extracellular r</b> | <b>HGNC: 3218</b> | <b>2p16.1</b> |
|---------------------|---------------|---------------------|----------------------------------------------------|-------------------|---------------|

**TCGA GLIOBLASTOMA MICROARRAY DATA**

Genes regulated by or correlated with NFKB

Total genes: 348

(blank cells mean that the gene ID was not found in TCGA)

| Symbol  | RefSeq    | Approved Name                             | HGNC ID    | Location | CORRELATION WITH EFEMP1 |             |            | Correlation          |
|---------|-----------|-------------------------------------------|------------|----------|-------------------------|-------------|------------|----------------------|
|         |           |                                           |            |          | Pearson's Rho           | p value     | p.adjusted |                      |
| ABCA1   | NM_005502 | ATP binding cassette subfamily A membe    | HGNC:29    | 9q31.1   | 0.7766                  | 2.27E-100   | 7.82E-98   | High positive correl |
| ABCB1   | NM_000927 | ATP binding cassette subfamily B membe    | HGNC:40    | 7q21.12  | 0.4908                  | 3.50E-31    | 1.20E-28   |                      |
| ABCB4   | NM_018849 | ATP binding cassette subfamily B membe    | HGNC:45    | 7q21.12  | -0.0909                 | 0.043856771 | 1          | Poor correl          |
| ABCC6   | NM_001171 | ATP binding cassette subfamily C membe    | HGNC:57    | 16p13.11 | -0.1914                 | 1.91E-05    | 0.00657115 | Poor correl          |
| ABCG8   | NM_022437 | ATP binding cassette subfamily G membe    | HGNC:13887 | 2p21     | -0.3561                 | 3.75E-16    | 1.29E-13   |                      |
| ADH1A   | NM_000667 | alcohol dehydrogenase 1A (class I), alpha | HGNC:249   | 4q23     | 0.3901                  | 2.48E-19    | 8.52E-17   |                      |
| ADORA1  | NM_000674 | adenosine A1 receptor                     | HGNC:262   | 1q32.1   | 0.7170                  | 8.36E-79    | 2.87E-76   | High positive correl |
| ADORA2A | NM_000675 | adenosine A2a receptor                    | HGNC:263   | 22q11.23 | -0.8507                 | 6.24E-139   | 2.15E-136  | High negative correl |
| AFP     | NM_001134 | alpha fetoprotein                         | HGNC:317   | 4q13.3   | -0.8360                 | 8.16E-130   | 2.81E-127  | High negative correl |
| AGER    | NM_001136 | advanced glycosylation end-product spec   | HGNC:320   | 6p21.32  | -0.1601                 | 0.000363332 | 0.12498608 | Poor correl          |
| AGT     | NM_000029 | angiotensinogen                           | HGNC:333   | 1q42.2   | 0.6580                  | 2.38E-62    | 8.18E-60   |                      |
| AICDA   | NM_020661 | activation induced cytidine deaminase     | HGNC:13203 | 12p13.31 | -0.3007                 | 9.72E-12    | 3.34E-09   | Poor correl          |
| ALOX12  | NM_000697 | arachidonate 12-lipoxygenase, 12S type    | HGNC:429   | 17p13.1  | -0.1845                 | 3.84E-05    | 0.01320317 | Poor correl          |
| AMACR   | NM_014324 | alpha-methylacyl-CoA racemase             | HGNC:451   | 5p13.2   | -0.2116                 | 2.20E-06    | 0.00075635 | Poor correl          |
| AMH     | NM_000479 | anti-Mullerian hormone                    | HGNC:464   | 19p13.3  | -0.3674                 | 3.59E-17    | 1.23E-14   |                      |
| ANGPT1  | NM_001146 | angiopoietin 1                            | HGNC:484   | 8q23.1   | 0.3300                  | 5.77E-14    | 1.99E-11   |                      |
| APOBEC2 | NM_006789 | apolipoprotein B mRNA editing enzyme c    | HGNC:605   | 6p21.1   | 0.2478                  | 2.55E-08    | 8.76E-06   | Poor correl          |
| APOC3   | NM_000040 | apolipoprotein C3                         | HGNC:610   | 11q23.3  | -0.8599                 | 3.61E-145   | 1.24E-142  | High negative correl |
| APOD    | NM_001647 | apolipoprotein D                          | HGNC:612   | 3q29     | 0.6612                  | 3.77E-63    | 1.30E-60   |                      |
| APOE    | NM_000041 | apolipoprotein E                          | HGNC:613   | 19q13.32 | 0.8639                  | 5.05E-148   | 1.74E-145  | High positive correl |
| AQP4    | NM_001650 | aquaporin 4                               | HGNC:637   | 18q11.2  | 0.8248                  | 1.92E-123   | 6.62E-121  | High positive correl |
| AR      | NM_000044 | androgen receptor                         | HGNC:644   | Xq12     | 0.7243                  | 3.65E-81    | 1.26E-78   | High positive correl |
| ARFRP1  | NM_003224 | ADP ribosylation factor related protein 1 | HGNC:662   | 20q13.33 | -0.6521                 | 6.59E-61    | 2.27E-58   | High negative correl |

|         |           |                                         |            |          |         |             |            |                      |
|---------|-----------|-----------------------------------------|------------|----------|---------|-------------|------------|----------------------|
| ART1    | NM_004314 | ADP-ribosyltransferase 1                | HGNC:723   | 11p15.4  | -0.1408 | 0.001736935 | 0.59750547 | Poor correl          |
| ASPH    | NM_004318 | aspartate beta-hydroxylase              | HGNC:757   | 8q12.3   | -0.6749 | 1.11E-66    | 3.80E-64   | High negative correl |
| ASS1    | NM_000050 | argininosuccinate synthase 1            | HGNC:758   | 9q34.11  | -0.5568 | 2.11E-41    | 7.25E-39   |                      |
| ATP1A2  | NM_000702 | ATPase Na+/K+ transporting subunit alph | HGNC:800   | 1q23.2   | 0.7421  | 3.50E-87    | 1.20E-84   | High positive correl |
| B2M     | NM_004048 | beta-2-microglobulin                    | HGNC:914   | 15q21.1  | 0.8711  | 1.87E-153   | 6.44E-151  | High positive correl |
| BACE1   | NM_012104 | beta-secretase 1                        | HGNC:933   | 11q23.3  | 0.7149  | 3.73E-78    | 1.28E-75   | High positive correl |
| BAX     | NM_004324 | BCL2 associated X, apoptosis regulator  | HGNC:959   | 19q13.33 | -0.2365 | 1.11E-07    | 3.81E-05   | Poor correl          |
| BCL2    | NM_000633 | BCL2, apoptosis regulator               | HGNC:990   | 18q21.33 | 0.5324  | 2.32E-37    | 7.97E-35   |                      |
| BCL2A1  | NM_004049 | BCL2 related protein A1                 | HGNC:991   | 15q25.1  | 0.6673  | 1.08E-64    | 3.71E-62   |                      |
| BCL2L1  | NM_138578 | BCL2 like 1                             | HGNC:992   | 20q11.21 | 0.4476  | 1.30E-25    | 4.47E-23   |                      |
| BCL2L11 | NM_138621 | BCL2 like 11                            | HGNC:994   | 2q13     | 0.0513  | 0.255901567 | 1          | Poor correl          |
| BCL3    | NM_005178 | B-cell CLL/lymphoma 3                   | HGNC:998   | 19q13.32 | -0.5468 | 1.05E-39    | 3.61E-37   |                      |
| BDKRB1  | NM_000710 | bradykinin receptor B1                  | HGNC:1029  | 14q32.2  | -0.2544 | 1.04E-08    | 3.58E-06   | Poor correl          |
| BDNF    | NM_001709 | brain derived neurotrophic factor       | HGNC:1033  | 11p14.1  | -0.6051 | 1.79E-50    | 6.14E-48   |                      |
| BIRC4   | NM_001167 | X-linked inhibitor of apoptosis         | HGNC:592   | Xq25     | 0.4265  | 3.60E-23    | 1.24E-20   |                      |
| BLNK    | NM_013314 | B-cell linker                           | HGNC:14211 | 10q24.1  | 0.2179  | 1.06E-06    | 0.00036385 | Poor correl          |
| BLR1    | NM_001716 | C-X-C motif chemokine receptor 5        | HGNC:1060  | 11q23.3  | -0.3862 | 6.02E-19    | 2.07E-16   |                      |
| BMI1    | NM_005180 | BMI1 proto-oncogene, polycomb ring fin  | HGNC:1066  | 10p12.2  | 0.7203  | 7.27E-80    | 2.50E-77   | High positive correl |
| BMP2    | NM_001200 | bone morphogenetic protein 2            | HGNC:1069  | 20p12.3  | 0.6795  | 6.64E-68    | 2.28E-65   |                      |
| BMP4    | NM_001202 | bone morphogenetic protein 4            | HGNC:1071  | 14q22.2  | -0.8474 | 8.35E-137   | 2.87E-134  | High negative correl |
| BNIP3   | NM_004052 | BCL2 interacting protein 3              | HGNC:1084  | 10q26.3  | -0.5051 | 3.23E-33    | 1.11E-30   |                      |
| BRCA2   | NM_000059 | BRCA2, DNA repair associated            | HGNC:1101  | 13q13.1  | 0.0190  | 0.673948881 | 1          | Poor correl          |
| BTK     | NM_000061 | Bruton tyrosine kinase                  | HGNC:1133  | Xq22.1   | 0.5997  | 2.21E-49    | 7.60E-47   |                      |
| C3      | NM_000064 | complement C3                           | HGNC:1318  | 19p13.3  | 0.6562  | 6.47E-62    | 2.23E-59   |                      |
| C4A     | NM_007293 | complement C4A (Rodgers blood group)    | HGNC:1323  | 6p21.33  | N/A     |             |            |                      |
| C4BPA   | NM_000715 | complement component 4 binding protei   | HGNC:1325  | 1q32.2   | -0.7205 | 6.49E-80    | 2.23E-77   | High negative correl |
| CALCB   | NM_000728 | calcitonin related polypeptide beta     | HGNC:1438  | 11p15.2  | 0.1464  | 0.00112919  | 0.38844142 | Poor correl          |
| CASP4   | NM_001225 | caspase 4                               | HGNC:1505  | 11q22.3  | -0.0150 | 0.739845237 | 1          | Poor correl          |
| CCL1    | NM_002981 | C-C motif chemokine ligand 1            | HGNC:10609 | 17q12    | -0.4183 | 2.91E-22    | 1.00E-19   |                      |
| CCL11   | NM_002986 | C-C motif chemokine ligand 11           | HGNC:10610 | 17q12    | -0.1340 | 0.00289026  | 0.99424951 | Poor correl          |
| CCL15   | NM_032965 | C-C motif chemokine ligand 15           | HGNC:10613 | 17q12    | 0.7268  | 5.74E-82    | 1.98E-79   | High positive correl |
| CCL17   | NM_002987 | C-C motif chemokine ligand 17           | HGNC:10615 | 16q21    | 0.2497  | 1.98E-08    | 6.82E-06   | Poor correl          |
| CCL19   | NM_006274 | C-C motif chemokine ligand 19           | HGNC:10617 | 9p13.3   | 0.6564  | 5.83E-62    | 2.01E-59   |                      |
| CCL2    | NM_002982 | C-C motif chemokine ligand 2            | HGNC:10618 | 17q12    | 0.8231  | 1.72E-122   | 5.92E-120  | High positive correl |
| CCL20   | NM_004591 | C-C motif chemokine ligand 20           | HGNC:10619 | 2q36.3   | 0.0378  | 0.40297742  | 1          | Poor correl          |
| CCL22   | NM_002990 | C-C motif chemokine ligand 22           | HGNC:10621 | 16q21    | -0.2469 | 2.88E-08    | 9.92E-06   | Poor correl          |

|        |              |                                          |            |          |         |             |            |                      |
|--------|--------------|------------------------------------------|------------|----------|---------|-------------|------------|----------------------|
| CCL23  | NM_005064    | C-C motif chemokine ligand 23            | HGNC:10622 | 17q12    | 0.5760  | 8.11E-45    | 2.79E-42   |                      |
| CCL28  | NM_148672    | C-C motif chemokine ligand 28            | HGNC:17700 | 5p12     | -0.8465 | 3.03E-136   | 1.04E-133  | High negative correl |
| CCL3   | NM_002983    | C-C motif chemokine ligand 3             | HGNC:10627 | 17q12    | 0.6574  | 3.39E-62    | 1.17E-59   |                      |
| CCL4   | NM_002984    | C-C motif chemokine ligand 4             | HGNC:10630 | 17q12    | 0.8187  | 3.73E-120   | 1.28E-117  | High positive correl |
| CCL5   | NM_002985    | C-C motif chemokine ligand 5             | HGNC:10632 | 17q12    | 0.7534  | 3.01E-91    | 1.04E-88   | High positive correl |
| CCND1  | NM_053056    | cyclin D1                                | HGNC:1582  | 11q13.3  | -0.7898 | 4.48E-106   | 1.54E-103  | High negative correl |
| CCND2  | NM_001759    | cyclin D2                                | HGNC:1583  | 12p13.32 | 0.4367  | 2.48E-24    | 8.53E-22   |                      |
| CCR5   | NM_000579    | C-C motif chemokine receptor 5 (gene/ps  | HGNC:1606  | 3p21.31  | 0.8403  | 2.33E-132   | 8.02E-130  | High positive correl |
| CCR7   | NM_001838    | C-C motif chemokine receptor 7           | HGNC:1608  | 17q21.2  | -0.7140 | 6.85E-78    | 2.36E-75   | High negative correl |
| CD209  | NM_021155    | CD209 molecule                           | HGNC:1641  | 19p13.2  | -0.4773 | 2.35E-29    | 8.08E-27   |                      |
| CD274  | NM_014143    | CD274 molecule                           | HGNC:17635 | 9p24.1   | 0.6604  | 6.03E-63    | 2.08E-60   |                      |
| CD38   | NM_001775    | CD38 molecule                            | HGNC:1667  | 4p15.32  | -0.2119 | 2.12E-06    | 0.0007283  | Poor correl          |
| CD3G   | NM_000073    | CD3g molecule                            | HGNC:1675  | 11q23.3  | -0.5271 | 1.57E-36    | 5.39E-34   |                      |
| CD40   | NM_001250    | CD40 molecule                            | HGNC:11919 | 20q13.12 | -0.3566 | 3.36E-16    | 1.15E-13   |                      |
| CD40LG | NM_000074    | CD40 ligand                              | HGNC:11935 | Xq26.3   | 0.5614  | 3.27E-42    | 1.13E-39   |                      |
| CD44   | NM_000610.3  | CD44 molecule (Indian blood group)       | HGNC:1681  | 11p13    | 0.3152  | 8.20E-13    | 2.82E-10   |                      |
| CD48   | NM_001778    | CD48 molecule                            | HGNC:1683  | 1q23.3   | -0.1625 | 0.00029655  | 0.10201336 | Poor correl          |
| CD69   | NM_001781    | CD69 molecule                            | HGNC:1694  | 12p13.31 | 0.4003  | 2.36E-20    | 8.11E-18   |                      |
| CD74   | NM_004355    | CD74 molecule                            | HGNC:1697  | 5q33.1   | 0.8473  | 9.46E-137   | 3.25E-134  | High positive correl |
| CD80   | NM_005191    | CD80 molecule                            | HGNC:1700  | 3q13.33  | 0.6402  | 4.25E-58    | 1.46E-55   |                      |
| CD83   | NM_004233    | CD83 molecule                            | HGNC:1703  | 6p23     | 0.3652  | 5.70E-17    | 1.96E-14   |                      |
| CD86   | NM_175862    | CD86 molecule                            | HGNC:1705  | 3q13.33  | 0.7996  | 1.31E-110   | 4.52E-108  | High positive correl |
| CDX1   | NM_001804    | caudal type homeobox 1                   | HGNC:1805  | 5q32     | N/A     |             |            |                      |
| CEBPD  | NM_005195    | CCAAT/enhancer binding protein delta     | HGNC:1835  | 8q11.21  | 0.8413  | 5.43E-133   | 1.87E-130  | High positive correl |
| CFB    | NM_001710    | complement factor B                      | HGNC:1037  | 6p21.33  | 0.2187  | 9.63E-07    | 0.00033137 | Poor correl          |
| CFLAR  | NM_003879    | CASP8 and FADD like apoptosis regulator  | HGNC:1876  | 2q33.1   | -0.0001 | 0.99870732  | 1          | Poor correl          |
| CHI3L1 | NM_001276    | chitinase 3 like 1                       | HGNC:1932  | 1q32.1   | 0.8758  | 4.35E-157   | 1.49E-154  | High positive correl |
| CIDEA  | NM_001279.3  | cell death-inducing DFFA-like effector a | HGNC:1976  | 18p11.21 | 0.3503  | 1.18E-15    | 4.07E-13   |                      |
| COL1A2 | NM_000089    | collagen type I alpha 2 chain            | HGNC:2198  | 7q21.3   | -0.4395 | 1.17E-24    | 4.03E-22   |                      |
| CR2    | NM_001006658 | complement C3d receptor 2                | HGNC:2336  | 1q32.2   | -0.5328 | 2.03E-37    | 6.98E-35   |                      |
| CREB3  | NM_006368    | cAMP responsive element binding protein  | HGNC:2347  | 9p13.3   | 0.2866  | 9.35E-11    | 3.21E-08   | Poor correl          |
| CRP    | NM_000567    | C-reactive protein                       | HGNC:2367  | 1q23.2   | 0.1088  | 0.015720942 | 1          | Poor correl          |
| CSF1   | NM_000757    | colony stimulating factor 1              | HGNC:2432  | 1p13.3   | 0.5659  | 5.26E-43    | 1.81E-40   |                      |
| CSF2   | NM_000758    | colony stimulating factor 2              | HGNC:2434  | 5q31.1   | -0.3978 | 4.23E-20    | 1.45E-17   |                      |
| CSF3   | NM_000759    | colony stimulating factor 3              | HGNC:2438  | 17q21.1  | -0.3298 | 6.00E-14    | 2.06E-11   |                      |
| CTSB   | NM_001908    | cathepsin B                              | HGNC:2527  | 8p23.1   | 0.7390  | 4.28E-86    | 1.47E-83   | High positive correl |

|          |              |                                          |            |          |         |             |            |                      |
|----------|--------------|------------------------------------------|------------|----------|---------|-------------|------------|----------------------|
| CXCL1    | NM_001511    | C-X-C motif chemokine ligand 1           | HGNC:4602  | 4q13.3   | -0.3761 | 5.56E-18    | 1.91E-15   |                      |
| CXCL3    | NM_002090    | C-X-C motif chemokine ligand 3           | HGNC:4604  | 4q13.3   | -0.1894 | 2.36E-05    | 0.00811433 | Poor correl          |
| CXCL5    | NM_002994    | C-X-C motif chemokine ligand 5           | HGNC:10642 | 4q13.3   | -0.1129 | 0.012223017 | 1          | Poor correl          |
| CXCL9    | NM_002416    | C-X-C motif chemokine ligand 9           | HGNC:7098  | 4q21.1   | 0.7481  | 2.49E-89    | 8.56E-87   | High positive correl |
| CYP19A1  | NM_000103    | cytochrome P450 family 19 subfamily A n  | HGNC:2594  | 15q21.2  | -0.0587 | 0.193906754 | 1          | Poor correl          |
| CYP27B1  | NM_000785    | cytochrome P450 family 27 subfamily B n  | HGNC:2606  | 12q14.1  | 0.0722  | 0.109513702 | 1          | Poor correl          |
| CYP7B1   | NM_004820    | cytochrome P450 family 7 subfamily B m   | HGNC:2652  | 8q12.3   | 0.6024  | 6.44E-50    | 2.22E-47   |                      |
| DEFB4    | NM_004942    | defensin beta 4A                         | HGNC:2767  | 8p23.1   | -0.2457 | 3.35E-08    | 1.15E-05   | Poor correl          |
| DIO2     | NM_000793    | iodothyronine deiodinase 2               | HGNC:2884  | 14q31.1  | 0.5261  | 2.22E-36    | 7.65E-34   |                      |
| DMP1     | NM_001079911 | dentin matrix acidic phosphoprotein 1    | HGNC:2932  | 4q22.1   | 0.4467  | 1.65E-25    | 5.67E-23   |                      |
| DNASE1L2 | NM_001374    | deoxyribonuclease 1 like 2               | HGNC:2958  | 16p13.3  | 0.4456  | 2.27E-25    | 7.81E-23   |                      |
| E2F3     | NM_001949    | E2F transcription factor 3               | HGNC:3115  | 6p22.3   | -0.6186 | 2.81E-53    | 9.66E-51   | High negative correl |
| EBI3     | NM_005755    | Epstein-Barr virus induced 3             | HGNC:3129  | 19p13.3  | -0.1218 | 0.006835804 | 1          | Poor correl          |
| EDN1     | NM_001955    | endothelin 1                             | HGNC:3176  | 6p24.1   | -0.0280 | 0.534825663 | 1          | Poor correl          |
| EGFR     | NM_005228    | epidermal growth factor receptor         | HGNC:3236  | 7p11.2   | 0.4196  | 2.09E-22    | 7.20E-20   |                      |
| ELF3     | NM_004433    | E74 like ETS transcription factor 3      | HGNC:3318  | 1q32.1   | -0.7532 | 3.39E-91    | 1.17E-88   | High negative correl |
| ENG      | NM_000118    | endoglin                                 | HGNC:3349  | 9q34.11  | -0.2157 | 1.37E-06    | 0.00047218 | Poor correl          |
| EPHA1    | NM_005232    | EPH receptor A1                          | HGNC:3385  | 7q34-q35 | -0.8169 | 3.51E-119   | 1.21E-116  | High negative correl |
| EPO      | NM_000799    | erythropoietin                           | HGNC:3415  | 7q22.1   | -0.7047 | 4.81E-75    | 1.65E-72   | High negative correl |
| ERBB2    | NM_001005862 | erb-b2 receptor tyrosine kinase 2        | HGNC:3430  | 17q12    | -0.6141 | 2.45E-52    | 8.42E-50   |                      |
| ERVWE1   | NM_014590    | endogenous retrovirus group W member     | HGNC:13525 | 7q21.2   | -0.4151 | 6.41E-22    | 2.21E-19   |                      |
| F3       | NM_001993    | coagulation factor III, tissue factor    | HGNC:3541  | 1p21.3   | 0.7683  | 5.57E-97    | 1.92E-94   | High positive correl |
| F8       | NM_000132    | coagulation factor VIII                  | HGNC:3546  | Xq28     | 0.4584  | 6.24E-27    | 2.15E-24   |                      |
| FABP6    | NM_001445    | fatty acid binding protein 6             | HGNC:3561  | 5q33.3   | -0.3945 | 8.98E-20    | 3.09E-17   |                      |
| FAS      | NM_000043    | Fas cell surface death receptor          | HGNC:11920 | 10q23.31 | 0.6700  | 2.13E-65    | 7.32E-63   |                      |
| FASLG    | NM_000639    | Fas ligand                               | HGNC:11936 | 1q24.3   | 0.7267  | 6.33E-82    | 2.18E-79   | High positive correl |
| FCER2    | NM_002002    | Fc fragment of IgE receptor II           | HGNC:3612  | 19p13.2  | 0.8038  | 1.37E-112   | 4.70E-110  | High positive correl |
| FCGRT    | NM_004107    | Fc fragment of IgG receptor and transpor | HGNC:3621  | 19q13.33 | 0.8451  | 2.19E-135   | 7.53E-133  | High positive correl |
| FGF8     | NM_006119    | fibroblast growth factor 8               | HGNC:3686  | 10q24.32 | 0.7105  | 8.20E-77    | 2.82E-74   | High positive correl |
| FN1      | NM_002026    | fibronectin 1                            | HGNC:3778  | 2q35     | -0.4305 | 1.28E-23    | 4.39E-21   |                      |
| FSTL3    | NM_005860    | follistatin like 3                       | HGNC:3973  | 19p13.3  | -0.1158 | 0.010155616 | 1          | Poor correl          |
| FTH1     | NM_002032    | ferritin heavy chain 1                   | HGNC:3976  | 11q12.3  | -0.4290 | 1.91E-23    | 6.57E-21   |                      |
| G6PC     | NM_000151    | glucose-6-phosphatase catalytic subunit  | HGNC:4056  | 17q21.31 | -0.7220 | 2.07E-80    | 7.12E-78   | High negative correl |
| GADD45B  | NM_015675    | growth arrest and DNA damage inducible   | HGNC:4096  | 19p13.3  | 0.5676  | 2.61E-43    | 8.98E-41   |                      |
| GATA3    | NM_001002295 | GATA binding protein 3                   | HGNC:4172  | 10p14    | -0.8237 | 7.82E-123   | 2.69E-120  | High negative correl |
| GBP1     | NM_002053    | guanylate binding protein 1              | HGNC:4182  | 1p22.2   | 0.8415  | 3.78E-133   | 1.30E-130  | High positive correl |

|          |              |                                            |            |          |         |             |           |                      |
|----------|--------------|--------------------------------------------|------------|----------|---------|-------------|-----------|----------------------|
| GNAI2    | NM_002070    | G protein subunit alpha i2                 | HGNC:4385  | 3p21.31  | 0.3350  | 2.43E-14    | 8.35E-12  |                      |
| GNB2L1   | NM_006098    | receptor for activated C kinase 1          | HGNC:4399  | 5q35.3   | -0.4926 | 1.92E-31    | 6.62E-29  |                      |
| GNRH2    | NM_001501    | gonadotropin releasing hormone 2           | HGNC:4420  | 20p13    | -0.4333 | 6.15E-24    | 2.11E-21  |                      |
| GRM2     | NM_000839    | glutamate metabotropic receptor 2          | HGNC:4594  | 3p21.2   | -0.5173 | 5.06E-35    | 1.74E-32  |                      |
| GSTP1    | NM_000852    | glutathione S-transferase pi 1             | HGNC:4638  | 11q13.2  | 0.2359  | 1.20E-07    | 4.13E-05  | Poor correl          |
| GZMB     | NM_004131    | granzyme B                                 | HGNC:4709  | 14q12    | 0.7606  | 5.67E-94    | 1.95E-91  | High positive correl |
| HAMP     | NM_021175    | hepcidin antimicrobial peptide             | HGNC:15598 | 19q13.12 | 0.1225  | 0.006536631 | 1         | Poor correl          |
| HAS1     | NM_001523    | hyaluronan synthase 1                      | HGNC:4818  | 19q13.41 | 0.3562  | 3.67E-16    | 1.26E-13  |                      |
| HBE1     | NM_005330    | hemoglobin subunit epsilon 1               | HGNC:4830  | 11p15.4  | -0.7916 | 6.87E-107   | 2.36E-104 | High negative correl |
| HBZ      | NM_005332    | hemoglobin subunit zeta                    | HGNC:4835  | 16p13.3  | -0.8228 | 2.58E-122   | 8.86E-120 | High negative correl |
| HIF1A    | NM_001530    | hypoxia inducible factor 1 alpha subunit   | HGNC:4910  | 14q23.2  | -0.6885 | 2.26E-70    | 7.76E-68  | High negative correl |
| HLA-B    | NM_005514    | major histocompatibility complex, class I, | HGNC:4932  | 6p21.33  | 0.3889  | 3.29E-19    | 1.13E-16  |                      |
| HLA-G    | NM_002127    | major histocompatibility complex, class I, | HGNC:4964  | 6p22.1   | 0.8187  | 3.77E-120   | 1.30E-117 | High positive correl |
| HMGNI    | NM_004965    | high mobility group nucleosome binding     | HGNC:4984  | 21q22.2  | -0.7346 | 1.37E-84    | 4.73E-82  | High negative correl |
| HMOX1    | NM_002133    | heme oxygenase 1                           | HGNC:5013  | 22q12.3  | 0.6502  | 1.90E-60    | 6.53E-58  |                      |
| HOXA9    | NM_152739    | homeobox A9                                | HGNC:5109  | 7p15.2   | 0.1247  | 0.005621592 | 1         | Poor correl          |
| HSD11B2  | NM_000196    | hydroxysteroid 11-beta dehydrogenase 2     | HGNC:5209  | 16q22.1  | -0.5429 | 4.56E-39    | 1.57E-36  |                      |
| HSP90AA1 | NM_001017963 | heat shock protein 90 alpha family class A | HGNC:5253  | 14q32.31 | -0.4394 | 1.21E-24    | 4.17E-22  |                      |
| ICAM1    | NM_000201    | intercellular adhesion molecule 1          | HGNC:5344  | 19p13.2  | -0.4372 | 2.22E-24    | 7.64E-22  |                      |
| ICAM1    | NM_000201    | intercellular adhesion molecule 1          | HGNC:5344  | 19p13.2  | -0.4372 | 2.22E-24    | 7.64E-22  |                      |
| IER3     | NM_003897    | immediate early response 3                 | HGNC:5392  | 6p21.33  | -0.4440 | 3.46E-25    | 1.19E-22  |                      |
| IFNB1    | NM_002176    | interferon beta 1                          | HGNC:5434  | 9p21.3   | 0.3556  | 4.12E-16    | 1.42E-13  |                      |
| IFNG     | NM_000619    | interferon gamma                           | HGNC:5438  | 12q15    | 0.8483  | 2.08E-137   | 7.16E-135 | High positive correl |
| IGFBP2   | NM_000597    | insulin like growth factor binding protein | HGNC:5471  | 2q35     | 0.4004  | 2.29E-20    | 7.88E-18  |                      |
| IGHG3    | M12958       | immunoglobulin heavy constant gamma 3      | HGNC:5527  | 14q32.33 | N/A     |             |           |                      |
| IGHG4    | K01316       | immunoglobulin heavy constant gamma 4      | HGNC:5528  | 14q32.33 | N/A     |             |           |                      |
| IL10     | NM_000572    | interleukin 10                             | HGNC:5962  | 1q32.1   | 0.7303  | 3.99E-83    | 1.37E-80  | High positive correl |
| IL11     | NM_000641    | interleukin 11                             | HGNC:5966  | 19q13.42 | -0.7362 | 3.90E-85    | 1.34E-82  | High negative correl |
| IL12A    | NM_000882    | interleukin 12A                            | HGNC:5969  | 3q25.33  | -0.7400 | 1.92E-86    | 6.60E-84  | High negative correl |
| IL12B    | NM_002187    | interleukin 12B                            | HGNC:5970  | 5q33.3   | 0.0621  | 0.169181662 | 1         | Poor correl          |
| IL13     | NM_002188    | interleukin 13                             | HGNC:5973  | 5q31.1   | 0.5219  | 1.00E-35    | 3.44E-33  |                      |
| IL15     | NM_172174    | interleukin 15                             | HGNC:5977  | 4q31.21  | -0.2376 | 9.69E-08    | 3.33E-05  | Poor correl          |
| IL15RA   | NM_172200    | interleukin 15 receptor subunit alpha      | HGNC:5978  | 10p15.1  | -0.0622 | 0.168052133 | 1         | Poor correl          |
| IL17A    | NM_002190    | interleukin 17A                            | HGNC:5981  | 6p12.2   | 0.2610  | 4.21E-09    | 1.45E-06  | Poor correl          |
| IL1A     | NM_000575    | interleukin 1 alpha                        | HGNC:5991  | 2q14.1   | -0.7417 | 5.11E-87    | 1.76E-84  | High negative correl |
| IL1B     | NM_000576    | interleukin 1 beta                         | HGNC:5992  | 2q14.1   | 0.5693  | 1.34E-43    | 4.60E-41  |                      |

|         |              |                                              |            |            |         |             |            |                      |
|---------|--------------|----------------------------------------------|------------|------------|---------|-------------|------------|----------------------|
| IL1RN   | NM_173842    | interleukin 1 receptor antagonist            | HGNC:6000  | 2q14.1     | -0.5233 | 6.13E-36    | 2.11E-33   |                      |
| IL2     | NM_000586    | interleukin 2                                | HGNC:6001  | 4q27       | 0.0171  | 0.704917697 | 1          | Poor correl          |
| IL23A   | NM_016584    | interleukin 23 subunit alpha                 | HGNC:15488 | 12q13.3    | 0.1876  | 2.80E-05    | 0.00964529 | Poor correl          |
| IL27    | NM_145659    | interleukin 27                               | HGNC:19157 | 16p12.1-p1 | 0.4755  | 4.03E-29    | 1.39E-26   |                      |
| IL2RA   | NM_000417    | interleukin 2 receptor subunit alpha         | HGNC:6008  | 10p15.1    | 0.8219  | 8.06E-122   | 2.77E-119  | High positive correl |
| IL32    | NM_001012635 | interleukin 32                               | HGNC:16830 | 16p13.3    | 0.2682  | 1.48E-09    | 5.11E-07   | Poor correl          |
| IL6     | NM_000600    | interleukin 6                                | HGNC:6018  | 7p15.3     | 0.3412  | 7.10E-15    | 2.44E-12   |                      |
| IL8     | NM_000584    | C-X-C motif chemokine ligand 8               | HGNC:6025  | 4q13.3     | -0.3100 | 2.04E-12    | 7.02E-10   |                      |
| IL8RA   | NM_000634    | C-X-C motif chemokine receptor 1             | HGNC:6026  | 2q35       | 0.3083  | 2.73E-12    | 9.39E-10   |                      |
| IL8RB   | NM_001557    | C-X-C motif chemokine receptor 2             | HGNC:6027  | 2q35       | 0.8344  | 7.53E-129   | 2.59E-126  | High positive correl |
| IL9     | NM_000590    | interleukin 9                                | HGNC:6029  | 5q31.1     | -0.4773 | 2.30E-29    | 7.90E-27   |                      |
| INHBA   | NM_002192    | inhibin beta A subunit                       | HGNC:6066  | 7p14.1     | -0.5943 | 2.70E-48    | 9.27E-46   |                      |
| IRF1    | NM_002198    | interferon regulatory factor 1               | HGNC:6116  | 5q31.1     | 0.2657  | 2.14E-09    | 7.36E-07   | Poor correl          |
| IRF2    | NM_002199    | interferon regulatory factor 2               | HGNC:6117  | 4q35.1     | 0.6906  | 5.70E-71    | 1.96E-68   |                      |
| IRF4    | NM_002460    | interferon regulatory factor 4               | HGNC:6119  | 6p25.3     | -0.8527 | 2.91E-140   | 1.00E-137  | High negative correl |
| IRF7    | NM_001572    | interferon regulatory factor 7               | HGNC:6122  | 11p15.5    | -0.3495 | 1.39E-15    | 4.78E-13   |                      |
| JUNB    | NM_002229    | JunB proto-oncogene, AP-1 transcription      | HGNC:6205  | 19p13.13   | 0.7563  | 2.50E-92    | 8.60E-90   | High positive correl |
| KCNK5   | NM_003740    | potassium two pore domain channel sub        | HGNC:6280  | 6p21.2     | -0.7311 | 2.13E-83    | 7.31E-81   | High negative correl |
| KCNN2   | NM_021614    | potassium calcium-activated channel sub      | HGNC:6291  | 5q22.3     | 0.6645  | 5.44E-64    | 1.87E-61   |                      |
| KISS1   | NM_002256    | KiSS-1 metastasis-suppressor                 | HGNC:6341  | 1q32.1     | -0.1013 | 0.024605362 | 1          | Poor correl          |
| KITLG   | NM_000899    | KIT ligand                                   | HGNC:6343  | 12q21.32   | 0.5748  | 1.59E-44    | 5.48E-42   |                      |
| KLK3    | NM_001030047 | kallikrein related peptidase 3               | HGNC:6364  | 19q13.33   | -0.4455 | 2.31E-25    | 7.93E-23   |                      |
| KLRA1   | NM_006611    | killer cell lectin like receptor A1, pseudog | HGNC:6372  | 12p13.2    | -0.5841 | 2.42E-46    | 8.34E-44   |                      |
| KRT15   | NM_002275    | keratin 15                                   | HGNC:6421  | 17q21.2    | -0.8310 | 6.40E-127   | 2.20E-124  | High negative correl |
| KRT3    | NM_057088    | keratin 3                                    | HGNC:6440  | 12q13.13   | -0.7768 | 1.82E-100   | 6.28E-98   | High negative correl |
| KRT5    | NM_000424    | keratin 5                                    | HGNC:6442  | 12q13.13   | 0.1686  | 0.00017205  | 0.05918534 | Poor correl          |
| KRT6B   | NM_005555    | keratin 6B                                   | HGNC:6444  | 12q13.13   | -0.1574 | 0.000457433 | 0.15735699 | Poor correl          |
| LAMB2   | NM_002292    | laminin subunit beta 2                       | HGNC:6487  | 3p21.31    | 0.3435  | 4.55E-15    | 1.57E-12   |                      |
| LBP     | NM_004139    | lipopolysaccharide binding protein           | HGNC:6517  | 20q11.23   | 0.2374  | 9.84E-08    | 3.38E-05   | Poor correl          |
| LCN2    | NM_005564    | lipocalin 2                                  | HGNC:6526  | 9q34.11    | 0.0088  | 0.845410962 | 1          | Poor correl          |
| LEF1    | NM_016269    | lymphoid enhancer binding factor 1           | HGNC:6551  | 4q25       | -0.2489 | 2.19E-08    | 7.54E-06   | Poor correl          |
| LIPG    | NM_006033    | lipase G, endothelial type                   | HGNC:6623  | 18q21.1    | 0.0888  | 0.049057932 | 1          | Poor correl          |
| LTA     | NM_000595    | lymphotoxin alpha                            | HGNC:6709  | 6p21.33    | -0.3671 | 3.84E-17    | 1.32E-14   |                      |
| LTB     | NM_002341    | lymphotoxin beta                             | HGNC:6711  | 6p21.33    | 0.7232  | 8.29E-81    | 2.85E-78   | High positive correl |
| LYZ     | NM_000239    | lysozyme                                     | HGNC:6740  | 12q15      | -0.4753 | 4.31E-29    | 1.48E-26   |                      |
| MADCAM1 | NM_130760    | mucosal vascular addressin cell adhesion     | HGNC:6765  | 19p13.3    | -0.5692 | 1.37E-43    | 4.72E-41   |                      |

|        |              |                                           |            |          |     |         |             |            |                      |
|--------|--------------|-------------------------------------------|------------|----------|-----|---------|-------------|------------|----------------------|
| MBP    | NM_001025081 | myelin basic protein                      | HGNC:6925  | 18q23    |     | 0.0430  | 0.340736724 | 1          | Poor correl          |
| MDK    | NM_001012334 | midkine (neurite growth-promoting facto   | HGNC:6972  | 11p11.2  |     | -0.8215 | 1.26E-121   | 4.35E-119  | High negative correl |
| MMP1   | NM_002421    | matrix metalloproteinase 1                | HGNC:7155  | 11q22.2  |     | -0.7758 | 4.75E-100   | 1.63E-97   | High negative correl |
| MMP13  | NM_002427    | matrix metalloproteinase 13               | HGNC:7159  | 11q22.2  |     | -0.3128 | 1.25E-12    | 4.29E-10   |                      |
| MMP3   | NM_002422    | matrix metalloproteinase 3                | HGNC:7173  | 11q22.2  |     | -0.7594 | 1.56E-93    | 5.38E-91   | High negative correl |
| MMP9   | NM_004994    | matrix metalloproteinase 9                | HGNC:7176  | 20q13.12 |     | 0.1135  | 0.0117634   | 1          | Poor correl          |
| MTHFR  | NM_005957    | methylenetetrahydrofolate reductase       | HGNC:7436  | 1p36.22  |     | 0.0150  | 0.739618611 | 1          | Poor correl          |
| MUC2   | NM_002457    | mucin 2, oligomeric mucus/gel-forming     | HGNC:7512  | 11p15.5  | N/A |         |             |            |                      |
| MYB    | NM_005375    | MYB proto-oncogene, transcription facto   | HGNC:7545  | 6q23.3   |     | -0.8563 | 1.10E-142   | 3.77E-140  | High negative correl |
| MYC    | NM_002467    | v-myc avian myelocytomatosis viral onco   | HGNC:7553  | 8q24.21  |     | -0.7788 | 2.67E-101   | 9.20E-99   | High negative correl |
| MYLK   | NM_053025    | myosin light chain kinase                 | HGNC:7590  | 3q21.1   |     | 0.8882  | 1.26E-167   | 4.33E-165  | High positive correl |
| MYOZ1  | NM_021245    | myozenin 1                                | HGNC:13752 | 10q22.2  |     | 0.2913  | 4.47E-11    | 1.54E-08   | Poor correl          |
| NCAM1  | NM_000615    | neural cell adhesion molecule 1           | HGNC:7656  | 11q23.2  |     | 0.4209  | 1.52E-22    | 5.23E-20   |                      |
| NFKB1  | NM_003998    | nuclear factor kappa B subunit 1          | HGNC:7794  | 4q24     |     | -0.5275 | 1.36E-36    | 4.68E-34   |                      |
| NFKB2  | NM_001077493 | nuclear factor kappa B subunit 2          | HGNC:7795  | 10q24.32 |     | -0.5131 | 2.16E-34    | 7.44E-32   |                      |
| NFKBIA | NM_020529    | NFKB inhibitor alpha                      | HGNC:7797  | 14q13.2  |     | 0.6513  | 1.03E-60    | 3.54E-58   |                      |
| NFKBIE | NM_004556    | NFKB inhibitor epsilon                    | HGNC:7799  | 6p21.1   |     | 0.1401  | 0.001842458 | 0.63380548 | Poor correl          |
| NFKBIZ | NM_001005474 | NFKB inhibitor zeta                       | HGNC:29805 | 3q12.3   |     | 0.3776  | 4.01E-18    | 1.38E-15   |                      |
| NGFB   | NM_002506    | nerve growth factor                       | HGNC:7808  | 1p13.2   |     | 0.1880  | 2.69E-05    | 0.00926919 | Poor correl          |
| NLF1   | NM_207322    | C2 calcium dependent domain containing    | HGNC:33627 | 15q22.2  |     | 0.6705  | 1.54E-65    | 5.31E-63   |                      |
| NLRP2  | NM_017852    | NLR family pyrin domain containing 2      | HGNC:22948 | 19q13.42 |     | -0.7787 | 2.89E-101   | 9.92E-99   | High negative correl |
| NOD2   | NM_022162    | nucleotide binding oligomerization doma   | HGNC:5331  | 16q12.1  |     | 0.7052  | 3.42E-75    | 1.17E-72   | High positive correl |
| NOS1   | NM_000620    | nitric oxide synthase 1                   | HGNC:7872  | 12q24.22 |     | 0.4648  | 9.67E-28    | 3.33E-25   |                      |
| NOS2A  | NM_000625    | nitric oxide synthase 2                   | HGNC:7873  | 17q11.2  |     | 0.6619  | 2.53E-63    | 8.69E-61   |                      |
| NOX1   | NM_007052    | NADPH oxidase 1                           | HGNC:7889  | Xq22.1   |     | -0.0018 | 0.968532915 | 1          | Poor correl          |
| NPY1R  | NM_000909    | neuropeptide Y receptor Y1                | HGNC:7956  | 4q32.2   |     | -0.7841 | 1.49E-103   | 5.12E-101  | High negative correl |
| NQO1   | NM_000903    | NAD(P)H quinone dehydrogenase 1           | HGNC:2874  | 16q22.1  |     | -0.7990 | 2.63E-110   | 9.03E-108  | High negative correl |
| NR4A2  | NM_006186    | nuclear receptor subfamily 4 group A me   | HGNC:7981  | 2q22-q23 |     | -0.1502 | 0.000833208 | 0.2866237  | Poor correl          |
| NRG1   | NM_004495    | neuregulin 1                              | HGNC:7997  | 8p12     |     | 0.2567  | 7.63E-09    | 2.63E-06   | Poor correl          |
| NUAK2  | NM_030952    | NUAK family kinase 2                      | HGNC:29558 | 1q32.1   |     | -0.2439 | 4.26E-08    | 1.47E-05   | Poor correl          |
| OLR1   | NM_002543    | oxidized low density lipoprotein receptor | HGNC:8133  | 12p13.2  |     | 0.8031  | 2.88E-112   | 9.92E-110  | High positive correl |
| OPN1SW | NM_001708    | opsin 1 (cone pigments), short-wave-sen   | HGNC:1012  | 7q32.1   |     | 0.2054  | 4.38E-06    | 0.00150562 | Poor correl          |
| OPRD1  | NM_000911    | opioid receptor delta 1                   | HGNC:8153  | 1p35.3   |     | -0.0389 | 0.389389852 | 1          | Poor correl          |
| OPRM1  | NM_000914    | opioid receptor mu 1                      | HGNC:8156  | 6q25.2   |     | -0.7340 | 2.19E-84    | 7.53E-82   | High negative correl |
| ORM1   | NM_000607    | orosomuroid 1                             | HGNC:8498  | 9q32     |     | -0.7930 | 1.58E-107   | 5.43E-105  | High negative correl |
| OXTR   | NM_000916    | oxytocin receptor                         | HGNC:8529  | 3p25.3   |     | 0.4853  | 1.98E-30    | 6.82E-28   |                      |

|          |                |                                            |            |          |         |             |            |                      |
|----------|----------------|--------------------------------------------|------------|----------|---------|-------------|------------|----------------------|
| PFAH2    | NM_000437      | platelet activating factor acetylhydrolase | HGNC:8579  | 1p36.11  | 0.5995  | 2.42E-49    | 8.31E-47   |                      |
| PDGFB    | NM_002608      | platelet derived growth factor subunit B   | HGNC:8800  | 22q13.1  | 0.3916  | 1.78E-19    | 6.13E-17   |                      |
| PDYN     | NM_024411      | prodynorphin                               | HGNC:8820  | 20p13    | 0.3065  | 3.68E-12    | 1.27E-09   |                      |
| PENK     | NM_006211      | proenkephalin                              | HGNC:8831  | 8q12.1   | 0.5364  | 5.39E-38    | 1.85E-35   |                      |
| PGLYRP1  | NM_005091      | peptidoglycan recognition protein 1        | HGNC:8904  | 19q13.32 | 0.6921  | 2.13E-71    | 7.32E-69   |                      |
| PGR      | NM_000926      | progesterone receptor                      | HGNC:8910  | 11q22.1  | -0.8366 | 3.56E-130   | 1.22E-127  | High negative correl |
| PI3      | NM_002638      | peptidase inhibitor 3                      | HGNC:8947  | 20q13.12 | 0.5088  | 9.32E-34    | 3.21E-31   |                      |
| PIGF     | NM_002643      | phosphatidylinositol glycan anchor biosyr  | HGNC:8962  | 2p21     | -0.3324 | 3.71E-14    | 1.28E-11   |                      |
| PIK3AP1  | NM_152309      | phosphoinositide-3-kinase adaptor prote    | HGNC:30034 | 10q24.1  | 0.5830  | 3.94E-46    | 1.36E-43   |                      |
| PIK3CA   | NM_006218      | phosphatidylinositol-4,5-bisphosphate 3-   | HGNC:8975  | 3q26.32  | 0.2732  | 7.15E-10    | 2.46E-07   | Poor correl          |
| PIM1     | NM_002648      | Pim-1 proto-oncogene, serine/threonine     | HGNC:8986  | 6p21.2   | -0.6783 | 1.40E-67    | 4.81E-65   | High negative correl |
| PLA2G1B  | AF058921.1     | phospholipase A2 group IB                  | HGNC:9030  | 12q24.31 | 0.4433  | 4.23E-25    | 1.45E-22   |                      |
| PLAU     | NM_002658      | plasminogen activator, urokinase           | HGNC:9052  | 10q22.2  | -0.0092 | 0.838294295 | 1          | Poor correl          |
| PLCD1    | NM_006225      | phospholipase C delta 1                    | HGNC:9060  | 3p22.2   | 0.4412  | 7.48E-25    | 2.57E-22   |                      |
| PLK3     | NM_004073      | polo like kinase 3                         | HGNC:2154  | 1p34.1   | 0.0386  | 0.393123054 | 1          | Poor correl          |
| POMC     | NM_000939      | proopiomelanocortin                        | HGNC:9201  | 2p23.3   | 0.5773  | 4.59E-45    | 1.58E-42   |                      |
| PPARGC1B | NM_001172698.1 | PPARG coactivator 1 beta                   | HGNC:30022 | 5q32     | 0.1490  | 0.000917893 | 0.31575527 | Poor correl          |
| PRDM1    | NM_00198       | PR/SET domain 1                            | HGNC:9346  | 6q21     | -0.1490 | 0.000915498 | 0.31493118 | Poor correl          |
| PRF1     | NM_005041      | perforin 1                                 | HGNC:9360  | 10q22.1  | 0.5258  | 2.52E-36    | 8.66E-34   |                      |
| PRKACA   | NM_002730      | protein kinase cAMP-activated catalytic s  | HGNC:9380  | 19p13.1  | 0.3463  | 2.60E-15    | 8.95E-13   |                      |
| PRKCD    | NM_006254      | protein kinase C delta                     | HGNC:9399  | 3p21.1   | 0.0061  | 0.891804543 | 1          | Poor correl          |
| PRL      | NM_000948      | prolactin                                  | HGNC:9445  | 6p22.3   | 0.5621  | 2.50E-42    | 8.60E-40   |                      |
| PSMA2    | NM_002787      | proteasome subunit alpha 2                 | HGNC:9531  | 7p14.1   | 0.4196  | 2.11E-22    | 7.27E-20   |                      |
| PSMB9    | NM_002800      | proteasome subunit beta 9                  | HGNC:9546  | 6p21.32  | 0.5917  | 8.46E-48    | 2.91E-45   |                      |
| PSME1    | NM_006263      | proteasome activator subunit 1             | HGNC:9568  | 14q12    | 0.2680  | 1.54E-09    | 5.28E-07   | Poor correl          |
| PSME2    | NM_002818      | proteasome activator subunit 2             | HGNC:9569  | 14q12    | -0.5047 | 3.73E-33    | 1.28E-30   |                      |
| PTAFR    | NM_000952      | platelet activating factor receptor        | HGNC:9582  | 1p35.3   | -0.2117 | 2.16E-06    | 0.00074418 | Poor correl          |
| PTEN     | NM_000314      | phosphatase and tensin homolog             | HGNC:9588  | 10q23.31 | -0.2403 | 6.82E-08    | 2.35E-05   | Poor correl          |
| PTGDS    | NM_000954      | prostaglandin D2 synthase                  | HGNC:9592  | 9q34.3   | 0.8775  | 1.72E-158   | 5.92E-156  | High positive correl |
| PTGS2    | NM_000963      | prostaglandin-endoperoxide synthase 2      | HGNC:9605  | 1q31.1   | -0.4099 | 2.32E-21    | 7.98E-19   |                      |
| PTH1H    | NM_002820      | parathyroid hormone like hormone           | HGNC:9607  | 12p11.22 | -0.5371 | 4.05E-38    | 1.39E-35   |                      |
| PTPN1    | NM_002827      | protein tyrosine phosphatase, non-recep    | HGNC:9642  | 20q13.13 | 0.3022  | 7.50E-12    | 2.58E-09   |                      |
| PTX3     | NM_002852      | pentraxin 3                                | HGNC:9692  | 3q25.32  | -0.0402 | 0.373020307 | 1          | Poor correl          |
| PYCARD   | NM_013258      | PYD and CARD domain containing             | HGNC:16608 | 16p11.2  | 0.4292  | 1.80E-23    | 6.18E-21   |                      |
| RAG1     | NM_000448      | recombination activating 1                 | HGNC:9831  | 11p12    | -0.3792 | 2.84E-18    | 9.78E-16   |                      |
| RAG2     | NM_000536      | recombination activating 2                 | HGNC:9832  | 11p13    | -0.2265 | 3.83E-07    | 0.00013188 | Poor correl          |



|          |                |                                            |            |          |         |             |            |                      |
|----------|----------------|--------------------------------------------|------------|----------|---------|-------------|------------|----------------------|
| RBBP4    | NM_005610      | RB binding protein 4, chromatin remodeli   | HGNC:9887  | 1p35.1   | 0.1187  | 0.008393826 | 1          | Poor correl          |
| REL      | NM_002908      | REL proto-oncogene, NF-kB subunit          | HGNC:9954  | 2p16.1   | -0.4225 | 1.02E-22    | 3.50E-20   |                      |
| RELB     | NM_006509      | RELB proto-oncogene, NF-kB subunit         | HGNC:9956  | 19q13.32 | -0.1543 | 0.000593485 | 0.20415886 | Poor correl          |
| S100A4   | NM_002961      | S100 calcium binding protein A4            | HGNC:10494 | 1q21.3   | -0.2190 | 9.29E-07    | 0.00031967 | Poor correl          |
| S100A6   | NM_014624      | S100 calcium binding protein A6            | HGNC:10496 | 1q21.3   | 0.2594  | 5.27E-09    | 1.81E-06   | Poor correl          |
| SAA1     | NM_000331      | serum amyloid A1                           | HGNC:10513 | 11p15.1  | 0.5888  | 3.16E-47    | 1.09E-44   |                      |
| SAA2     | NM_030754      | serum amyloid A2                           | HGNC:10514 | 11p15.1  | 0.6890  | 1.65E-70    | 5.66E-68   |                      |
| SAA3P    | S73444.1       | serum amyloid A3 pseudogene                | HGNC:10515 | 11p15.1  | -0.3841 | 9.72E-19    | 3.34E-16   |                      |
| SAT1     | NM_002970      | spermidine/spermine N1-acetyltransfera     | HGNC:10540 | Xp22.11  | 0.5038  | 5.04E-33    | 1.73E-30   |                      |
| SCNN1A   | NM_001038      | sodium channel epithelial 1 alpha subuni   | HGNC:10599 | 12p13    | -0.4049 | 7.72E-21    | 2.65E-18   |                      |
| SDC4     | NM_002999      | syndecan 4                                 | HGNC:10661 | 20q13.12 | 0.2579  | 6.48E-09    | 2.23E-06   | Poor correl          |
| SELE     | NM_000450      | selectin E                                 | HGNC:10718 | 1q24.2   | 0.5833  | 4.31E-46    | 1.48E-43   |                      |
| SELP     | NM_003005      | selectin P                                 | HGNC:10721 | 1q24.2   | 0.7419  | 4.34E-87    | 1.49E-84   | High positive correl |
| SELS     | NM_018445      | selenoprotein S                            | HGNC:30396 | 15q26.3  | 0.5897  | 2.07E-47    | 7.14E-45   |                      |
| SEN2     | NM_021627      | SUMO1/sentrin/SMT3 specific peptidase      | HGNC:23116 | 3q27.2   | 0.1347  | 0.002756768 | 0.94832818 | Poor correl          |
| SERPINA1 | NM_000295      | serpin family A member 1                   | HGNC:8941  | 14q32.13 | -0.4414 | 7.14E-25    | 2.46E-22   |                      |
| SERPINA3 | NM_001085      | serpin family A member 3                   | HGNC:16    | 14q32.13 | 0.7732  | 5.53E-99    | 1.90E-96   | High positive correl |
| SERPINB1 | NM_030666      | serpin family B member 1                   | HGNC:3311  | 6p25.2   | 0.2934  | 3.19E-11    | 1.10E-08   | Poor correl          |
| SERPINE1 | NM_000602      | serpin family E member 1                   | HGNC:8583  | 7q22.1   | -0.1242 | 0.005788889 | 1          | Poor correl          |
| SERPINE2 | NM_006216      | serpin family E member 2                   | HGNC:8951  | 2q36.1   | -0.7652 | 8.81E-96    | 3.03E-93   | High negative correl |
| SH3BGRL  | NM_003022      | SH3 domain binding glutamate rich prote    | HGNC:10823 | Xq21.1   | -0.1061 | 0.018540919 | 1          | Poor correl          |
| SKP2     | NM_005983      | S-phase kinase associated protein 2        | HGNC:10901 | 5p13.2   | -0.6768 | 3.47E-67    | 1.19E-64   | High negative correl |
| SLC11A2  | NM_000617      | solute carrier family 11 member 2          | HGNC:10908 | 12q13.12 | 0.1720  | 0.000125737 | 0.04325342 | Poor correl          |
| SLC16A1  | NM_003051      | solute carrier family 16 member 1          | HGNC:10922 | 1p13.2   | 0.0032  | 0.944093737 | 1          | Poor correl          |
| SLC2A5   | NM_003039      | solute carrier family 2 member 5           | HGNC:11010 | 1p36.23  | 0.8171  | 2.57E-119   | 8.83E-117  | High positive correl |
| SLC3A2   | NM_001012661   | solute carrier family 3 member 2           | HGNC:11026 | 11q12.3  | -0.6220 | 5.03E-54    | 1.73E-51   | High negative correl |
| SLC6A6   | NM_003043      | solute carrier family 6 member 6           | HGNC:11052 | 3p25.1   | -0.6275 | 3.16E-55    | 1.09E-52   | High negative correl |
| SNAI1    | NM_005985      | snail family transcriptional repressor 1   | HGNC:11128 | 20q13.13 | -0.2357 | 1.22E-07    | 4.21E-05   | Poor correl          |
| SOD1     | NM_000454      | superoxide dismutase 1, soluble            | HGNC:11179 | 21q22.11 | -0.0686 | 0.12855924  | 1          | Poor correl          |
| SOD2     | NM_000636      | superoxide dismutase 2, mitochondrial      | HGNC:11180 | 6q25.3   | 0.4566  | 1.05E-26    | 3.61E-24   |                      |
| SOX9     | NM_000346      | SRY-box 9                                  | HGNC:11204 | 17q24.3  | 0.7704  | 7.90E-98    | 2.72E-95   | High positive correl |
| SP7      | AF477981.1     | Sp7 transcription factor                   | HGNC:17321 | 12q13.13 | -0.2800 | 2.68E-10    | 9.23E-08   | Poor correl          |
| SPI1     | NM_001080547.1 | Spi-1 proto-oncogene                       | HGNC:11241 | 11p11.2  | 0.4501  | 6.51E-26    | 2.24E-23   |                      |
| SPP1     | NM_001040058   | secreted phosphoprotein 1                  | HGNC:11255 | 4q22.1   | 0.7789  | 2.38E-101   | 8.18E-99   | High positive correl |
| ST6GAL1  | NM_173216      | ST6 beta-galactoside alpha-2,6-sialyltrans | HGNC:10860 | 3q27.3   | -0.1095 | 0.015127921 | 1          | Poor correl          |
| ST8SIA1  | NM_003034      | ST8 alpha-N-acetyl-neuraminide alpha-2,    | HGNC:10869 | 12p12.1  | 0.0288  | 0.523244155 | 1          | Poor correl          |

|          |              |                                            |            |          |         |             |            |                      |
|----------|--------------|--------------------------------------------|------------|----------|---------|-------------|------------|----------------------|
| STAT5A   | NM_003152    | signal transducer and activator of transcr | HGNC:11366 | 17q21.2  | -0.7340 | 2.19E-84    | 7.54E-82   | High negative correl |
| TACR1    | NM_015727    | tachykinin receptor 1                      | HGNC:11526 | 2p12     | 0.0523  | 0.246995209 | 1          | Poor correl          |
| TAP1     | NM_000593    | transporter 1, ATP binding cassette subfa  | HGNC:43    | 6p21.32  | -0.1932 | 1.66E-05    | 0.00571583 | Poor correl          |
| TAPBP    | NM_003190    | TAP binding protein                        | HGNC:11566 | 6p21.32  | -0.5331 | 1.76E-37    | 6.04E-35   |                      |
| TERT     | NM_198253    | telomerase reverse transcriptase           | HGNC:11730 | 5p15.33  | -0.8454 | 1.52E-135   | 5.24E-133  | High negative correl |
| TFEC     | NM_001018058 | transcription factor EC                    | HGNC:11754 | 7q31.2   | 0.8005  | 4.86E-111   | 1.67E-108  | High positive correl |
| TFF3     | NM_003226    | trefoil factor 3                           | HGNC:11757 | 21q22.3  | -0.6935 | 8.76E-72    | 3.01E-69   | High negative correl |
| TFPI2    | NM_006528    | tissue factor pathway inhibitor 2          | HGNC:11761 | 7q21.3   | -0.6699 | 2.34E-65    | 8.06E-63   | High negative correl |
| TGM1     | NM_000359    | transglutaminase 1                         | HGNC:11777 | 14q12    | 0.4976  | 3.89E-32    | 1.34E-29   |                      |
| TGM2     | NM_004613    | transglutaminase 2                         | HGNC:11778 | 20q11.23 | -0.5790 | 2.20E-45    | 7.56E-43   |                      |
| TICAM1   | NM_014261    | toll like receptor adaptor molecule 1      | HGNC:18348 | 19p13.3  | -0.4808 | 7.89E-30    | 2.71E-27   |                      |
| TLR2     | NM_003264    | toll like receptor 2                       | HGNC:11848 | 4q31.3   | 0.9061  | 3.30E-185   | 1.13E-182  | High positive correl |
| TLR9     | NM_017442    | toll like receptor 9                       | HGNC:15633 | 3p21.2   | -0.4845 | 2.53E-30    | 8.72E-28   |                      |
| TNC      | NM_002160    | tenascin C                                 | HGNC:5318  | 9q33.1   | 0.7952  | 1.50E-108   | 5.16E-106  | High positive correl |
| TNF      | NM_000594    | tumor necrosis factor                      | HGNC:11892 | 6p21.33  | -0.6425 | 1.29E-58    | 4.43E-56   | High negative correl |
| TNFAIP3  | NM_006290    | TNF alpha induced protein 3                | HGNC:11896 | 6q23.3   | -0.3342 | 2.65E-14    | 9.10E-12   |                      |
| TNFRSF4  | NM_003327    | TNF receptor superfamily member 4          | HGNC:11918 | 1p36.33  | 0.6970  | 8.91E-73    | 3.07E-70   |                      |
| TNFRSF9  | NM_001561    | TNF receptor superfamily member 9          | HGNC:11924 | 1p36.23  | -0.3996 | 2.74E-20    | 9.41E-18   |                      |
| TNFSF10  | NM_003810    | tumor necrosis factor superfamily memb     | HGNC:11925 | 3q26     | 0.7665  | 2.83E-96    | 9.74E-94   | High positive correl |
| TNFSF13B | NM_006573    | tumor necrosis factor superfamily memb     | HGNC:11929 | 13q33.3  | 0.8317  | 2.84E-127   | 9.77E-125  | High positive correl |
| TNFSF15  | NM_005118    | tumor necrosis factor superfamily memb     | HGNC:11931 | 9q32     | 0.6932  | 1.04E-71    | 3.58E-69   |                      |
| TNIP1    | NM_006058    | TNFAIP3 interacting protein 1              | HGNC:16903 | 5q33.1   | -0.5861 | 1.00E-46    | 3.46E-44   |                      |
| TNIP3    | NM_024873    | TNFAIP3 interacting protein 3              | HGNC:19315 | 4q27     | 0.4624  | 1.97E-27    | 6.77E-25   |                      |
| TP53     | NM_000546    | tumor protein p53                          | HGNC:11998 | 17p13.1  | -0.8041 | 9.83E-113   | 3.38E-110  | High negative correl |
| TPMT     | NM_000367    | thiopurine S-methyltransferase             | HGNC:12014 | 6p22.3   | -0.4280 | 2.48E-23    | 8.54E-21   |                      |
| TRAF1    | NM_005658    | TNF receptor associated factor 1           | HGNC:12031 | 9q33.2   | 0.1280  | 0.004456815 | 1          | Poor correl          |
| TRAF2    | NM_021138    | TNF receptor associated factor 2           | HGNC:12032 | 9q34.3   | -0.2325 | 1.83E-07    | 6.28E-05   | Poor correl          |
| TREM1    | NM_018643    | triggering receptor expressed on myeloid   | HGNC:17760 | 6p21.1   | 0.8699  | 1.67E-152   | 5.74E-150  | High positive correl |
| TRPC1    | NM_003304    | transient receptor potential cation chann  | HGNC:12333 | 3q23     | 0.6310  | 5.47E-56    | 1.88E-53   |                      |
| TWIST1   | NM_000474    | twist family bHLH transcription factor 1   | HGNC:12428 | 7p21.1   | 0.0480  | 0.287544937 | 1          | Poor correl          |
| UPK1B    | NM_006952    | uroplakin 1B                               | HGNC:12578 | 3q13.32  | -0.2160 | 1.32E-06    | 0.00045357 | Poor correl          |
| UPP1     | NM_003364    | uridine phosphorylase 1                    | HGNC:12576 | 7p12.3   | 0.1332  | 0.003076028 | 1          | Poor correl          |
| VCAM1    | NM_001078    | vascular cell adhesion molecule 1          | HGNC:12663 | 1p21.2   | 0.8616  | 2.27E-146   | 7.80E-144  | High positive correl |
| VEGFC    | NM_005429    | vascular endothelial growth factor C       | HGNC:12682 | 4q34.3   | -0.1191 | 0.008188162 | 1          | Poor correl          |
| VIM      | NM_003380    | vimentin                                   | HGNC:12692 | 10p13    | 0.1521  | 0.000710518 | 0.24441813 | Poor correl          |
| WT1      | NM_000378    | Wilms tumor 1                              | HGNC:12796 | 11p13    | -0.7916 | 6.45E-107   | 2.22E-104  | High negative correl |

|     |           |                          |                    |        |          |          |
|-----|-----------|--------------------------|--------------------|--------|----------|----------|
| YY1 | NM_003403 | YY1 transcription factor | HGNC:12856 14q32.2 | 0.5446 | 2.46E-39 | 8.48E-37 |
|-----|-----------|--------------------------|--------------------|--------|----------|----------|
