# Supplementary material
Source: PubMed Central journal article supplement (PMC5570669)
Supplement: NIHMS857883-supplement-11.pdf [file NIHMS857883-supplement-11.pdf]

**Nandhu et al.**

Tumor-derived fibulin-3 activates pro-invasive NF-kappa B signaling in glioblastoma cells and their microenvironment

**Supplementary Table S-IV:  
INGENUITY PATHWAY ANALYSIS**

**TOP NETWORKS CONTAINING NFKB-REGULATED GENES POORLY CORRELATED WITH EFEMP1**

| <b>Top Diseases and Functions</b>                                                 | <b>Score</b> | <b>Focus Molecules</b>                                                                                             |
|-----------------------------------------------------------------------------------|--------------|--------------------------------------------------------------------------------------------------------------------|
| Cellular development; cell growth and proliferation                               | 33           | ABCC6, ALOX12, CCL17, HAMP, IL32, IL12B, LCN2, LIPG, NOX1, NUAK2, PLK3, SDC4, SENP2, SLC11A2, ST8SIA1, TAP1, VEGFC |
| Immune cell-to-cell signaling; immune cell trafficking                            | 26           | CCL11, CCL20, CCL22, CFB, CXCL5, DEFB4A, EBI3, ENG, FSTL3, KRT6B, LBP, NFKBIE, PTX3, ST6GAL1                       |
| Hemathological system development; lymphoid tissue structure                      | 21           | AICDA, BLC2L11, BLNK, CD38, CRP, IL15, IL15RA, IL23A, KISS1, MTHFR, PRDM1, RAG2                                    |
| Cellular movement; organismal injury and abnormalities                            | 21           | ABCB4, AGER, AMACR, CD48, PIK3CA, PLAU, S100A4, S100A6, SERPINE1, SNAI1, SP7, TWIST1                               |
| Cell-mediated immune response; cellular development                               | 19           | BRCA2, CFLAR, CYP27B1, IL2, IRF1, MYOZ1, NR4A2, PSME1, RBBP4, SERPINB1, UPP1                                       |
| Inflammatory response; organismal injury and abnormalities                        | 15           | CALCB, CASP4, CXCL3, CYP19A1, EDN1, GSTP1, NGF, SOD1                                                               |
| Cell morphology; cell growth and proliferation; connective tissue development     | 15           | APOBEC2, CREB3, HOXA9, OPN1SW, PPARGC1B, SH3BGRL, SLC16A1, TRAF1, TRAF2                                            |
| Cell death and survival; dermatological diseases and conditions                   | 11           | ART1, BAX, KRT5, LEF1, PRKCD, RELB, VIM                                                                            |
| Nervous system development; cell-to-cell signaling; cellular function and mainter | 9            | BDKRB1, IL17A, MBP, NRG1, PTEN, TACR1                                                                              |
| Inflammatory disease; cell signaling; cell-to-cell signaling                      | 4            | OPRD1, PTAFR, UPK1B                                                                                                |

**TOP NETWORKS CONTAINING NFKB-REGULATED GENES HIGHLY CORRELATED WITH EFEMP1**

| <b>Top Diseases and Functions</b>                                                 | <b>Score</b> | <b>Focus Molecules</b>                                                                  |
|-----------------------------------------------------------------------------------|--------------|-----------------------------------------------------------------------------------------|
| Cellular movement; tissue development                                             | 26           | AR, BMI1, BMP4, CCDN1, EPHA1, FGF8, GATA3, HMGN1, PGR, SERPINE2, SOX9, SPP1, TERT, TP53 |
| Cell-to-cell signaling and interaction; inflammatory response                     | 23           | APOC3, ASPHH, IL10, IL11, IL1A, IL2RA, KRT3, MMP3, SLC3A2, SLC6A6, TLR2, TREM1, WT1     |
| Cell-to-cell signaling and Interaction; Cellular Movement                         | 19           | ABCA1, CCL4, CCL5, CCL28, HBE1, HBZ, HIF1A, IFNG, NQO1, ORM1, SELP, TNC                 |
| Cancer; cell death and survival; organismal injury                                | 17           | B2M, CCL15, CD86, CXCL9, GBP1, HLA-G, IRF4, SLC2A5, TFEC, TNFSF10                       |
| Cell-to-cell signaling and interaction; cellular movement                         | 15           | ATP1A2, CTSB, CXCR2, FCER2, FCGRT, MMP1, OLR1, TFPI1, TNFSF13B                          |
| Cell cycle; cellular development; cellular growth and proliferation               | 12           | CEBPD, E2F3, EPO, G6PC, JUNB, MYB, PIM1, SKP2                                           |
| Cell-to-cell signaling and interaction; Immune cell response                      | 12           | ADORA1, ADORA2A, CCL2, CCR5, CCR7, FASLG, KCNK5, NPY1R                                  |
| Cellular function and maintenance, cell morphology; cancer; cell death and surviv | 11           | CD74, CHI3L1, ELF3, LTB, NLRP2, NOD2, TNF                                               |
| Organismal injury and abnormalities; tissue morphology                            | 11           | AKP, APOE, F3, IL12A, MDK, PTGDS, TFF3,                                                 |
| Cellular assembly and organization; cellular development; auditory disease        | 9            | AQP4, ARFRP1, GZMB, KRT15, SERPINA3, TNC                                                |
